# Supplementary material for: Localized light-triggered release macrophage cytopharmaceuticals containing O-nitrobenzyl group for enhanced solid tumor cell-chemotherapy
Source: PubMed Central journal article supplement — Acta Pharm Sin B. 2024 Sep 12;14(11):5053–68. doi: 10.1016/j.apsb.2024.08.033 (PMC11628841; doi:10.1016/j.apsb.2024.08.033), 2024-09-12
Supplement: mmc1.pdf [file mmc1.pdf]

## Supporting Information for

## ORIGINAL ARTICLE

# Localized light-triggered release macrophage cytopharmaceuticals containing *O*-nitrobenzyl group for enhanced solid tumor cell-chemotherapy

Jinhu Liu<sup>†</sup>, Han Yang<sup>†</sup>, Xiao Sang, Tong Gao, Zipeng Zhang, Shunli Fu, Huizhen Yang, Lili Chang, Xiaoqing Liu, Shuang Liang, Shijun Yuan, Suyun Wei, Yuxin Yang, Xiaoxin Yan, Xinke Zhang, Weiwei Mu, Yongjun Liu\*, Na Zhang

Department of Pharmaceutics, Key Laboratory of Chemical Biology (Ministry of Education), NMPA Key Laboratory for Technology Research and Evaluation of Drug Products, School of Pharmaceutical Sciences, Cheeloo College of Medicine, Shandong University, Jinan 250012, China

Received 28 May 2024; received in revised form 15 August 2024; accepted 20 August 2024

\*Corresponding authors.

E-mail address: [liuyongjun@sdu.edu.cn](mailto:liuyongjun@sdu.edu.cn) (Yongjun Liu).

<sup>†</sup>These authors made equal contributions to this work.

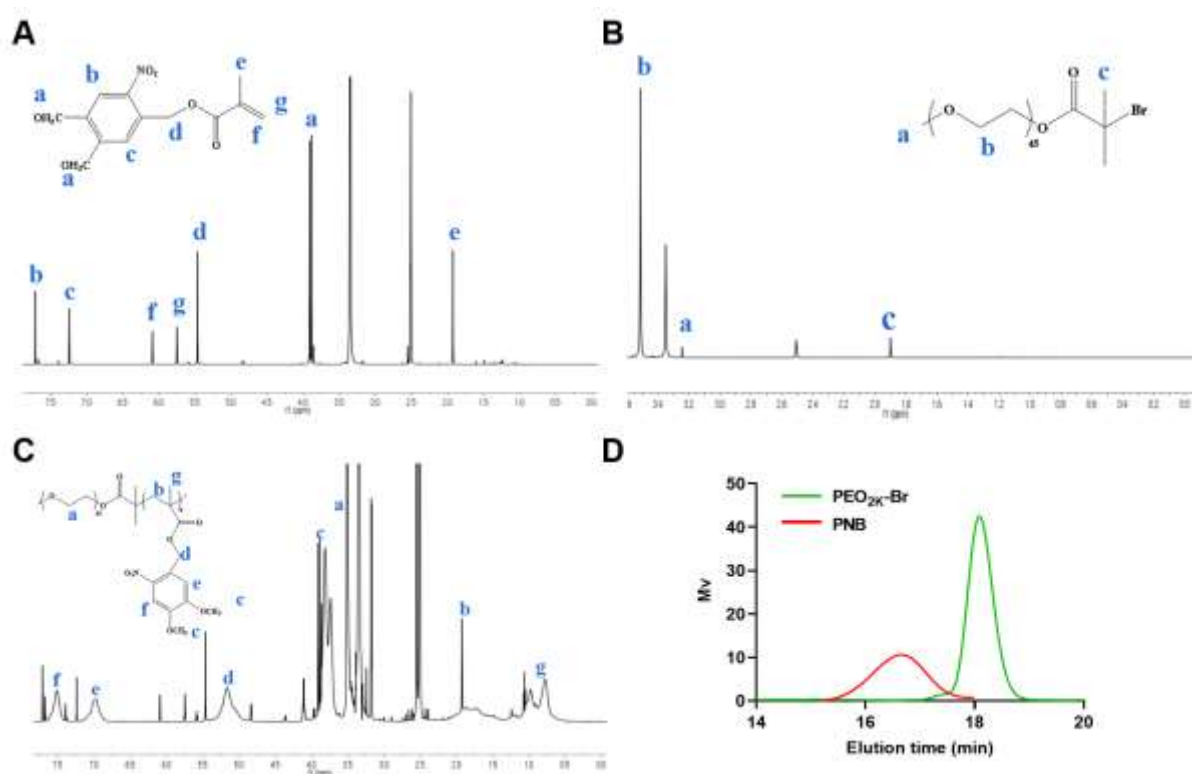

**Figure S1** (A-C) The <sup>1</sup>H-NMR spectrum of (A) the monomer NBMA, (B) PEO<sub>2K</sub>-Br and (C) PNB. (D) Gel permeation chromatography spectrums of PEO<sub>2K</sub>-Br and PNB.

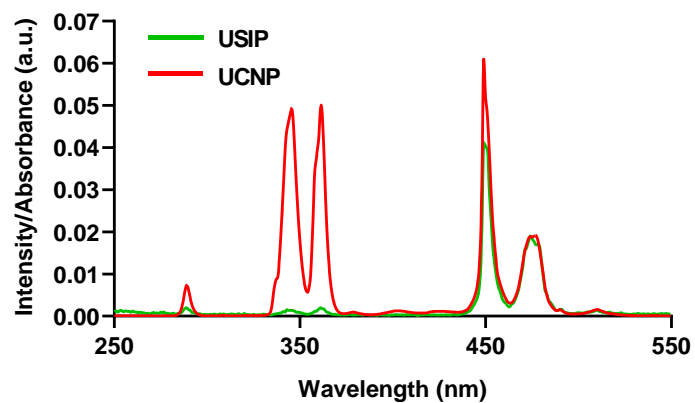

**Figure S2** The emission spectra of the USIPs (green line) and the UCNP (red line).

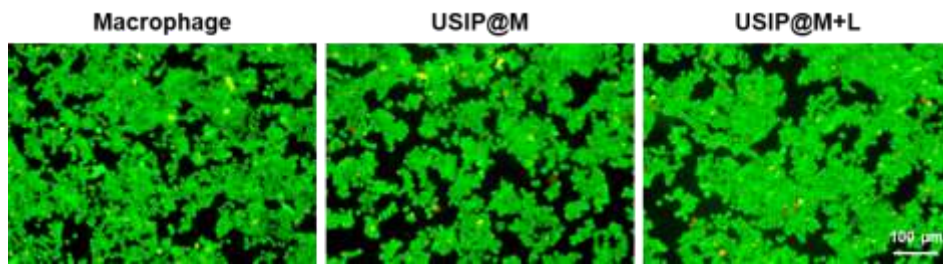

**Figure S3** Phototoxicity investigation of USIP@M after NIR irradiation. USIP@M was irradiated with NIR light (980 nm, 1 W, 10 min), and then detected by Calcein-AM/PI live cell/dead cell double staining kit, scale bar = 100  $\mu\text{m}$ .

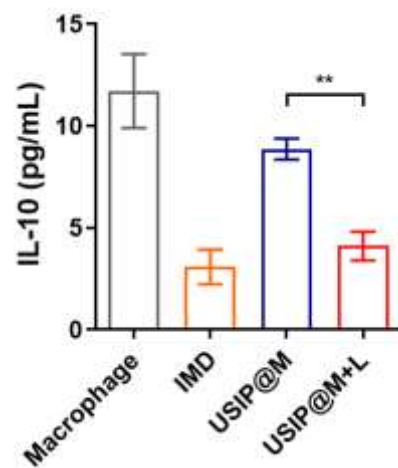

**Figure S4** Cytokine IL-10 analysis of USIP@M 24 h after irradiation with or without NIR light. The IMD group (RAW264.7 cells incubated with IMD) contained the same concentration of IMD as USIP@M and USIP@M+L group. Data are presented as mean $\pm$ SD ( $n=3$ ).  $**P < 0.01$ .

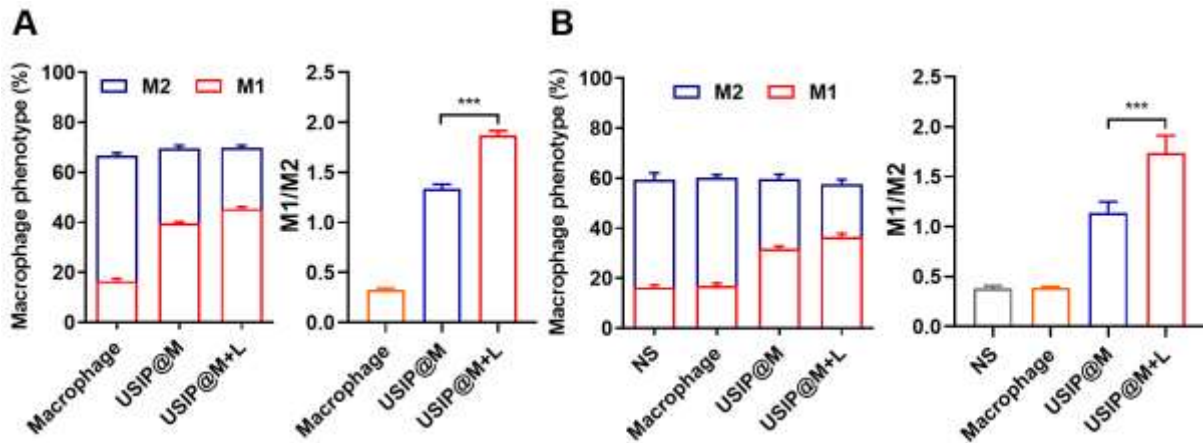

**Figure S5** (A) Phenotype analysis of adoptively transferred macrophage after injection with macrophage, USIP@M and USIP@M+L groups. (B) Phenotype analysis of endogenous TAM related to A. Data are presented as mean $\pm$ SD ( $n=3$ ). \*\*\* $P < 0.001$ .

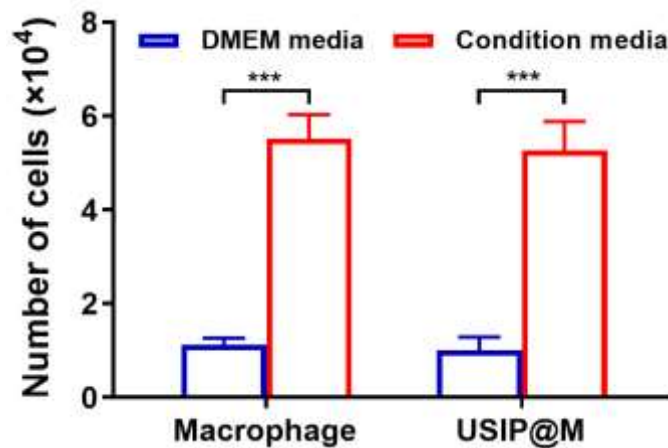

**Figure S6** Quantitative results for evaluating migration capacity of macrophage and USIP@M *in vitro*. Data are presented as mean $\pm$ SD ( $n=3$ ). \*\*\* $P < 0.001$ .

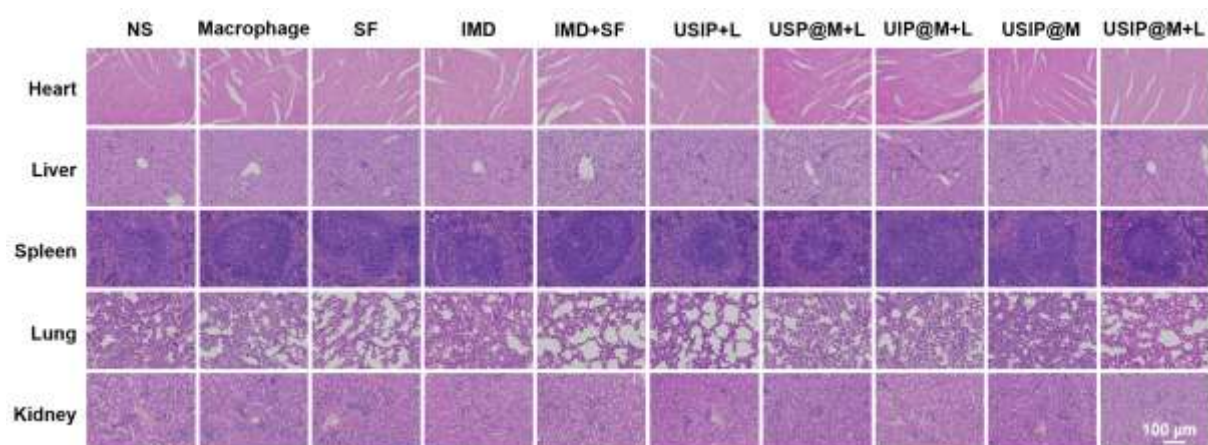

**Figure S7** H&E stained images of main organs (heart, liver, spleen, lung and kidney) after *i.v.* administration with different formulations, scale bar = 100  $\mu\text{m}$ .

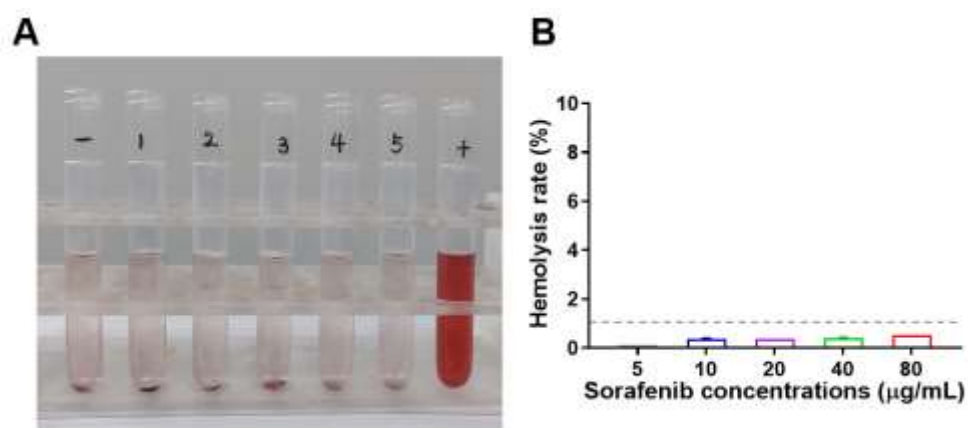

**Figure S8** (A) The hemolysis image of USIP@M. (B) The hemolysis rate with a series of doses of USIP@M at the concentration of SF in 5, 10, 20, 40 and 80  $\mu\text{g/mL}$ . Data are presented as mean $\pm$ SD ( $n=3$ ).

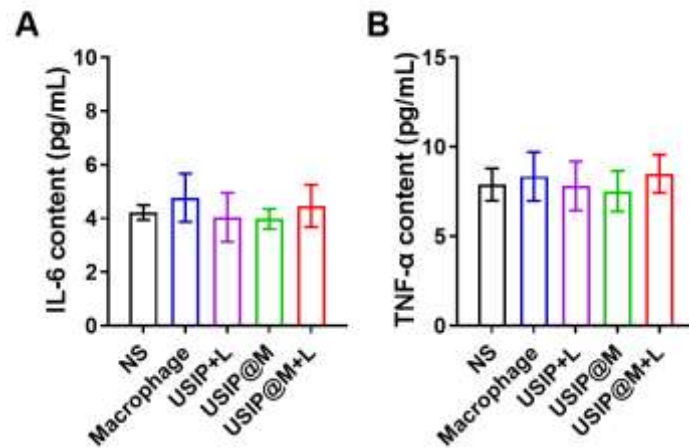

**Figure S9** (A) Serum cytokine concentrations of IL-6 assessed at 48 h after the first injection. (B) Serum cytokine concentrations of TNF- $\alpha$  assessed at 48 h after the first injection. Data are presented as mean $\pm$ SD ( $n=3$ ).

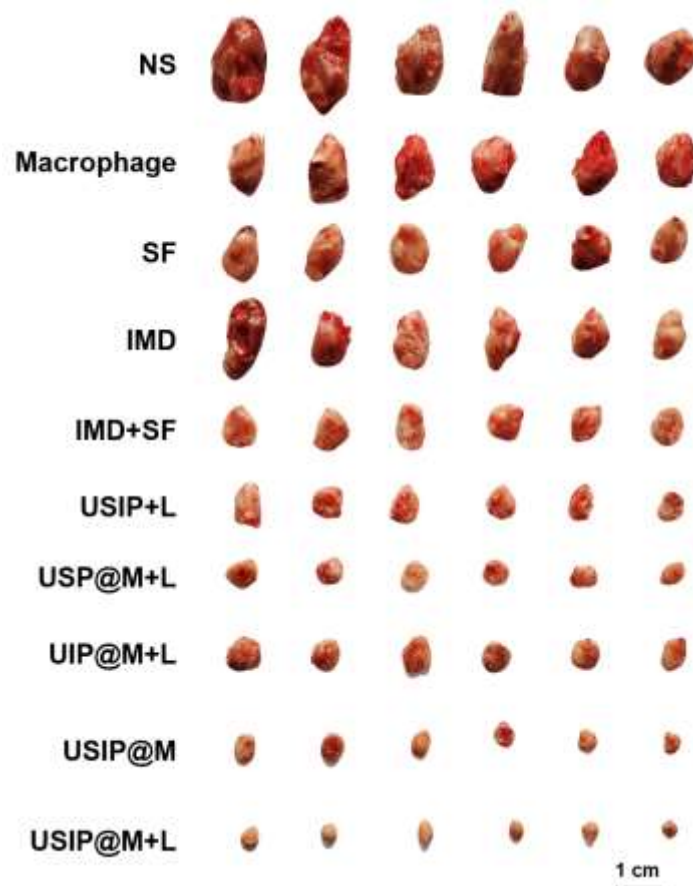

**Figure S10** Tumor photographs of H22 tumor-bearing mice receiving the indicated treatments related to Fig. 4 ( $n = 6$ ), scale bar = 1 cm.

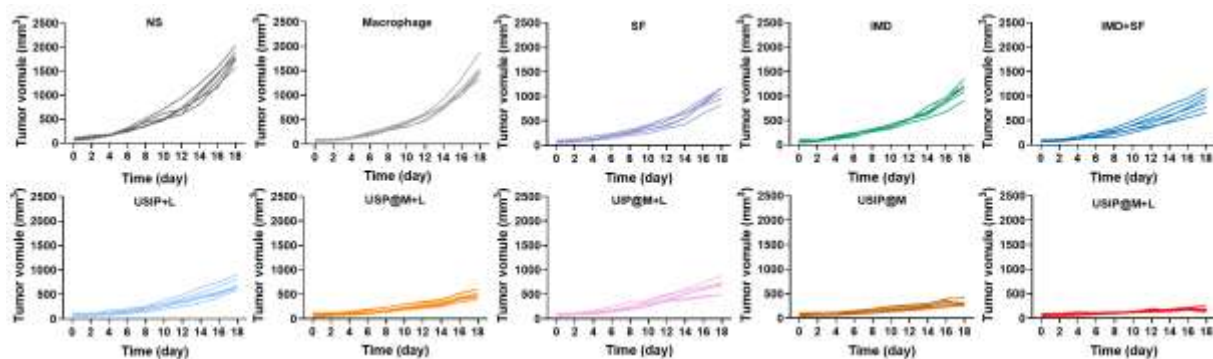

**Figure S11** Individual tumor growth curves of mice after *i.v.* administration with different formulations ( $n = 6$ ).

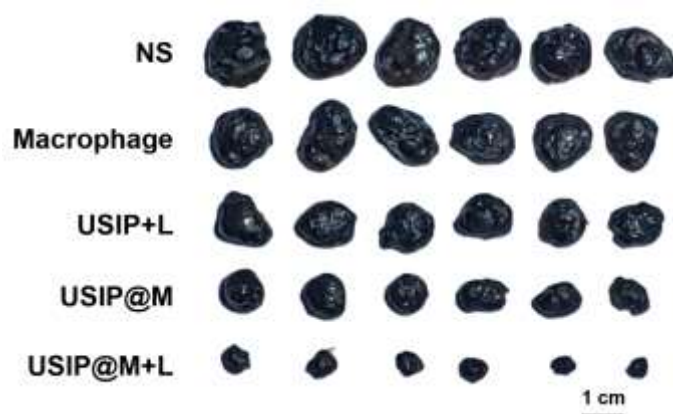

**Figure S12** Tumor photographs of B16F10 tumor-bearing mice receiving the indicated treatments related to Fig. 6 ( $n = 6$ ), scale bar = 1 cm.



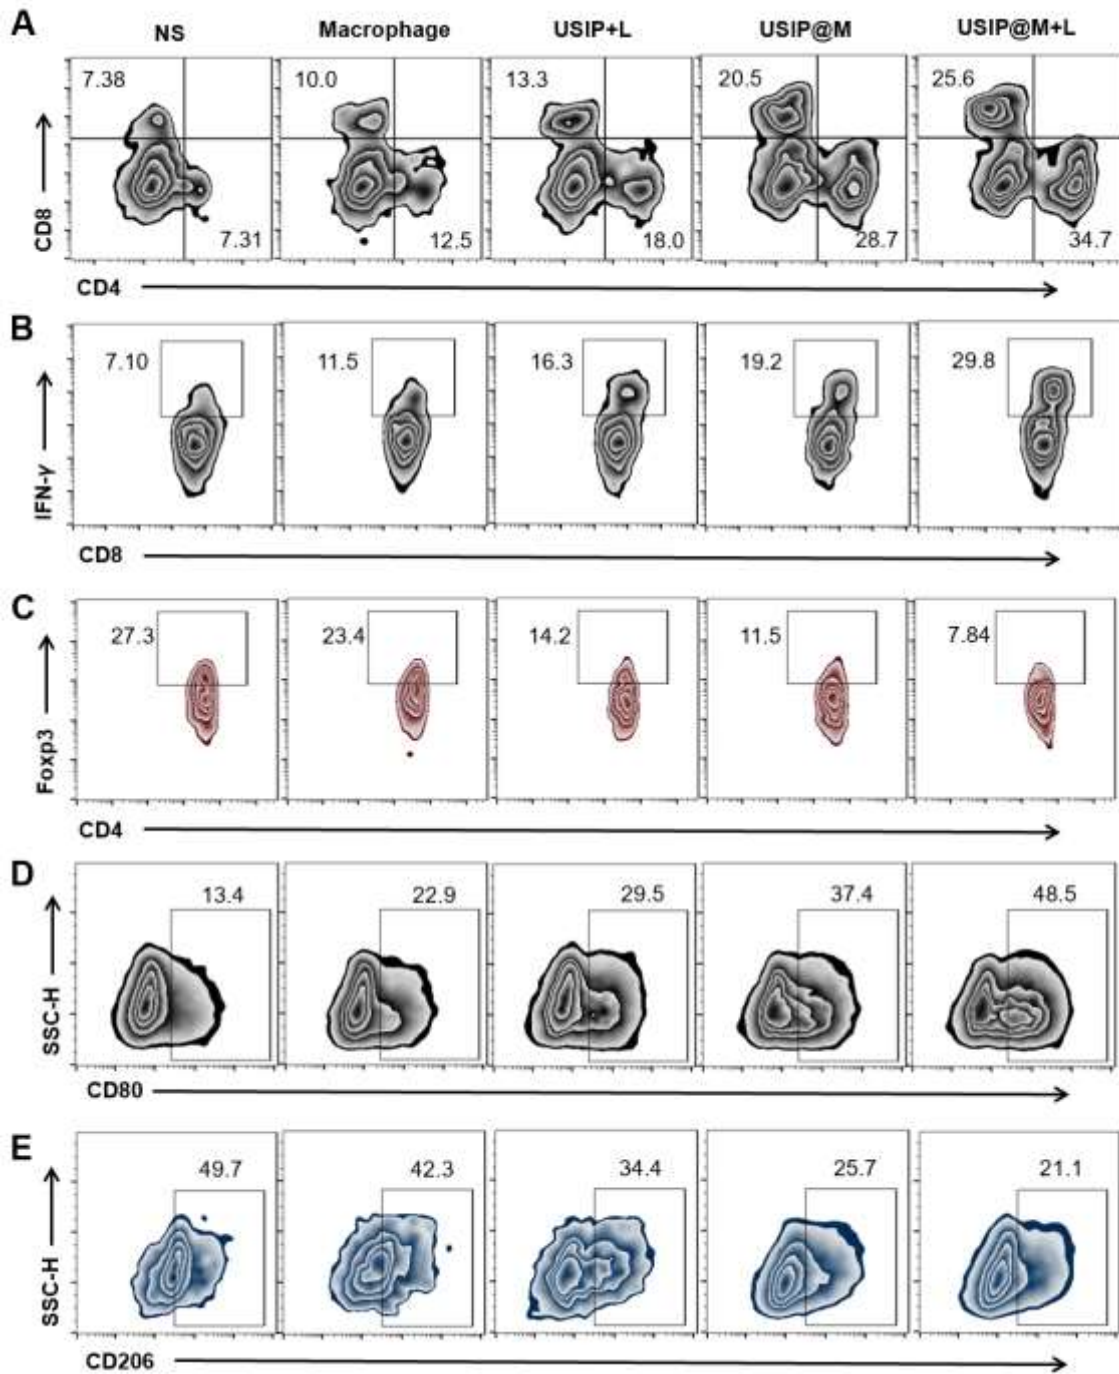

**Figure S13** Representative flow cytometry plots of intratumoural (A) CD4<sup>+</sup> and CD8<sup>+</sup> T cells, (B) CD8<sup>+</sup>IFN- $\gamma$ <sup>+</sup> T cells, (C) Treg in CD4<sup>+</sup> T cells, (D) M1-type macrophages and (E) M2-type macrophages related to Fig 6F-L.



**Table S1.** Characterization of exosomes from different treatment groups

| Group      | Intensity size (nm) | Zeta potential (mV) |
|------------|---------------------|---------------------|
| Macrophage | 106.93 ± 3.39       | -13.13 ± 1.07       |
| USIP@M     | 117.87 ± 6.36       | -13.00 ± 1.14       |
| USIP@M+L   | 112.80 ± 3.35       | -13.37 ± 1.42       |

**Table S2.** IC<sub>50</sub> in different treatment groups related to Fig. 2M

| Group                    | Free SF        | USIP            | USIP+L         | Released<br>medium from<br>USIP@M+L |
|--------------------------|----------------|-----------------|----------------|-------------------------------------|
| IC <sub>50</sub> (µg/mL) | 5.56 ± 2.22*** | 20.20 ± 8.01*** | 3.77 ± 0.47*** | 0.76 ± 0.34                         |

\**P* indicate statistical significance compared to the released medium from USIP@M+L group.

Data are presented as mean±SD (*n* = 3).\*\*\**P* < 0.001.
